# Supplementary material for: Immune-related adverse events and prognosis in patients with upper gastrointestinal cancer treated with nivolumab
Source: PubMed Central journal article supplement — J Gastrointest Oncol. 2022 Dec;13(6):2779–88. doi: 10.21037/jgo-22-281 (PMC9830324; doi:10.21037/jgo-22-281), 2022-12
Supplement: jgo-13-06-2779-dss.pdf [file jgo-13-06-2779-dss.pdf]

## Data Sharing Statement

|                     |                                                                                                                                                     |                                                                                                                     |
|---------------------|-----------------------------------------------------------------------------------------------------------------------------------------------------|---------------------------------------------------------------------------------------------------------------------|
| <b>Article Info</b> | <a href="https://dx.doi.org/10.21037/jgo-22-281">https://dx.doi.org/10.21037/jgo-22-281</a>                                                         |                                                                                                                     |
| <b>Item</b>         | <b>Question</b>                                                                                                                                     | <b>Authors' Response<br/>(place "-" if not applicable)</b>                                                          |
| 1                   | Would you like to share data collected for your study to others?                                                                                    | Yes                                                                                                                 |
| 2                   | If not, would you like to share the reason for your decision?                                                                                       | -                                                                                                                   |
| 3                   | What data in particular will be shared?                                                                                                             | The survival data in particular will be shared, and we also found a correlation between the irAEs.                  |
| 4                   | Any other documents will be shared? Such as study protocol, statistical analysis plan, informed consent form, clinical study report, analytic code. | Statistical analysis plan, informed consent form, and clinical study report will also be shared if requested.       |
| 5                   | When will data availability begin?                                                                                                                  | From the publication date.                                                                                          |
| 6                   | When will data availability end?                                                                                                                    | Two years within the publication date, since the technique or survival data may be updated over time.               |
| 7                   | To whom will you share the data?                                                                                                                    | Medical oncologists and gastroenterological surgeons who are interested in studies of upper gastrointestinal tract. |
| 8                   | For what type of analysis or purpose?                                                                                                               | For analysis to evaluate the safety of Nivolumab in upper gastrointestinal cancer patients.                         |
| 9                   | How or where can the data/documents be obtained?                                                                                                    | Emails could be sent to the address below to obtain the shared data: hdobaba@kumamoto-u.ac.jp                       |
| 10                  | Any other restrictions?                                                                                                                             | -                                                                                                                   |
